# Supplementary material for: Systematic review and meta-analysis of Japanese familial Alzheimer's disease and FTDP-17
Source: PubMed Central journal article supplement — J Hum Genet. 2015 Feb 19;60(5):281–3. doi: 10.1038/jhg.2015.15 (PMC4521293; doi:10.1038/jhg.2015.15), 2015-02-19
Supplement: jhg201515x1.pdf [file jhg201515x1.pdf]

# Supplementary Table 1

| ID  | Individual ID | Pedigree ID | Gene  | Protein                | cDNA              | Exon | Region    | Confirmed     | ApoE |
|-----|---------------|-------------|-------|------------------------|-------------------|------|-----------|---------------|------|
| 1   | 1             | Sporadic    | PSEN1 | p.Leu85Pro             | c.254T>C          | 4    | TM-I      | Performed     | 3*3  |
| 2   | 2             | 1           | PSEN1 | p.Val96Phe             | c.286G>T          | 4    | TM-I      | Performed     | NA   |
| 3   | 3             | 1           | PSEN1 | p.Val96Phe             | c.286G>T          | 4    | TM-I      | Performed     | NA   |
| 4   | 4             | 1           | PSEN1 | p.Val96Phe             | c.286G>T          | 4    | TM-I      | Performed     | NA   |
| 5   | 5             | 2           | PSEN1 | p.His163Arg            | c.488A>G          | 6    | HL-II     | Performed     | NA   |
| 6   | 6             | 3           | PSEN1 | p.His163Arg            | NA                | 6    | HL-II     | Performed     | NA   |
| 7   | 7             | 4           | PSEN1 | p.Gly209Arg            | c.625G>A          | 7    | TM-IV     | Performed     | 3*3  |
| 8   | 8             | 4           | PSEN1 | p.Gly209Arg            | c.625G>A          | 7    | TM-IV     | Performed     | 3*4  |
| 9   | 9             | 4           | PSEN1 | p.Gly209Arg            | c.625G>A          | 7    | TM-IV     | Performed     | 3*4  |
| 10  | 10            | 4           | PSEN1 | p.Gly209Arg            | c.625G>A          | 7    | TM-IV     | Not performed | NA   |
| 11  | 11            | 4           | PSEN1 | p.Gly209Arg            | c.625G>A          | 7    | TM-IV     | Not performed | NA   |
| 12  | 12            | 4           | PSEN1 | p.Gly209Arg            | c.625G>A          | 7    | TM-IV     | Not performed | NA   |
| 13  | 13            | 5           | PSEN1 | p.Ile213Thr            | c.638T>C          | 7    | TM-IV     | Performed     | NA   |
| 14  | 14            | 5           | PSEN1 | p.Ile213Thr            | c.638T>C          | 7    | TM-IV     | Performed     | NA   |
| 16  | 16            | 6           | PSEN1 | p.Met233Leu            | NA                | 7    | TM-V      | Performed     | NA   |
| 17  | 17            | Sporadic    | PSEN1 | p.Phe237Ile            | c.709A>T          | 7    | TM-V      | Performed     | 3*3  |
| 18  | 18            | NA          | PSEN1 | p.Pro284Leu            | NA                | 8    | HL-VI(MA) | Performed     | NA   |
| 19  | 19            | 7           | PSEN1 | p.(S290C:T291 S319del) | c.869 955del      | 8    | HL-VI(MA) | Performed     | NA   |
| 20  | 20            | 7           | PSEN1 | p.(S290C:T291 S319del) | c.869 955del      | 8    | HL-VI(MA) | Performed     | NA   |
| 21  | 21            | 8           | PSEN1 | p.(S290C:T291 S319del) | c.869 955del      | 8    | HL-VI(MA) | Not performed | NA   |
| 22  | 22            | 8           | PSEN1 | p.(S290C:T291 S319del) | c.869 955del      | 8    | HL-VI(MA) | Not performed | NA   |
| 23  | 23            | 8           | PSEN1 | p.(S290C:T291 S319del) | c.869 955del      | 8    | HL-VI(MA) | Not performed | NA   |
| 24  | 24            | 8           | PSEN1 | p.(S290C:T291 S319del) | c.869 955del      | 8    | HL-VI(MA) | Not performed | NA   |
| 25  | 25            | 8           | PSEN1 | p.(S290C:T291 S319del) | c.869 955del      | 8    | HL-VI(MA) | Not performed | NA   |
| 26  | 26            | 8           | PSEN1 | p.(S290C:T291 S319del) | c.869 955del      | 8    | HL-VI(MA) | Not performed | NA   |
| 27  | 27            | 8           | PSEN1 | p.(S290C:T291 S319del) | c.869 955del      | 8    | HL-VI(MA) | Not performed | NA   |
| 28  | 28            | 8           | PSEN1 | p.(S290C:T291 S319del) | c.869 955del      | 8    | HL-VI(MA) | Not performed | NA   |
| 29  | 29            | 8           | PSEN1 | p.(S290C:T291 S319del) | c.869 955del      | 8    | HL-VI(MA) | Not performed | NA   |
| 30  | 30            | 8           | PSEN1 | p.(S290C:T291 S319del) | c.869 955del      | 8    | HL-VI(MA) | Not performed | NA   |
| 31  | 31            | 9           | PSEN1 | p.Ala285Val            | c.854C>T          | 8    | HL-VI(MA) | Performed     | NA   |
| 32  | 32            | 9           | PSEN1 | p.Ala285Val            | c.854C>T          | 8    | HL-VI(MA) | Not performed | NA   |
| 33  | 33            | 10          | PSEN1 | p.Ile143Thr            | c.428C>T          | 5    | TM-II     | Performed     | 3*4  |
| 34  | 34            | 10          | PSEN1 | p.Ile143Thr            | c.428C>T          | 5    | TM-II     | Performed     | 3*3  |
| 35  | 35            | 10          | PSEN1 | p.Ile143Thr            | c.428C>T          | 5    | TM-II     | Not performed | NA   |
| 36  | 36            | 10          | PSEN1 | p.Ile143Thr            | c.428C>T          | 5    | TM-II     | Not performed | NA   |
| 37  | 37            | 10          | PSEN1 | p.Ile143Thr            | c.428C>T          | 5    | TM-II     | Not performed | NA   |
| 38  | 38            | 12          | PSEN1 | p.Leu250Val            | c.748T>G          | 7    | TM-VI     | Performed     | 3*3  |
| 39  | 39            | 12          | PSEN1 | p.Leu250Val            | c.748T>G          | 7    | TM-VI     | Performed     | 3*4  |
| 40  | 40            | 12          | PSEN1 | p.Leu250Val            | c.748T>G          | 7    | TM-VI     | Not performed | NA   |
| 41  | 41            | 12          | PSEN1 | p.Leu250Val            | c.748T>G          | 7    | TM-VI     | Not performed | NA   |
| 42  | 42            | 12          | PSEN1 | p.Leu250Val            | c.748T>G          | 7    | TM-VI     | Not performed | NA   |
| 43  | 43            | 12          | PSEN1 | p.Leu250Val            | c.748T>G          | 7    | TM-VI     | Not performed | NA   |
| 44  | 44            | 12          | PSEN1 | p.Leu250Val            | c.748T>G          | 7    | TM-VI     | Not performed | NA   |
| 45  | 45            | 13          | PSEN1 | p.Leu282Phe            | c.844C>T          | 8    | HL-VI(MA) | Performed     | 3*4  |
| 46  | 46            | 13          | PSEN1 | p.Leu282Phe            | c.844C>T          | 8    | HL-VI(MA) | Not performed | NA   |
| 47  | 47            | 14          | PSEN1 | p.Tyr154Asn            | c.460T>A          | 5    | TM-II     | Performed     | 3*3  |
| 48  | 48            | 14          | PSEN1 | p.Tyr154Asn            | c.460T>A          | 5    | TM-II     | Not performed | NA   |
| 49  | 49            | 15          | PSEN1 | p.Ala260Val            | c.779C>T          | 8    | TM-VI     | Performed     | NA   |
| 50  | 50            | 15          | PSEN1 | p.Ala260Val            | c.779C>T          | 8    | TM-VI     | Performed     | NA   |
| 51  | 51            | 15          | PSEN1 | p.Ala260Val            | c.779C>T          | 8    | TM-VI     | NA            | NA   |
| 52  | 52            | 15          | PSEN1 | p.Ala260Val            | c.779C>T          | 8    | TM-VI     | NA            | NA   |
| 53  | 53            | 15          | PSEN1 | p.Ala260Val            | c.779C>T          | 8    | TM-VI     | NA            | NA   |
| 54  | 54            | 15          | PSEN1 | p.Ala260Val            | c.779C>T          | 8    | TM-VI     | NA            | NA   |
| 55  | 55            | 15          | PSEN1 | p.Ala260Val            | c.779C>T          | 8    | TM-VI     | NA            | NA   |
| 56  | 56            | 15          | PSEN1 | p.Ala260Val            | c.779C>T          | 8    | TM-VI     | NA            | NA   |
| 57  | 57            | 15          | PSEN1 | p.Ala260Val            | c.779C>T          | 8    | TM-VI     | NA            | NA   |
| 58  | 58            | 15          | PSEN1 | p.Ala260Val            | c.779C>T          | 8    | TM-VI     | NA            | NA   |
| 59  | 59            | 16          | PSEN1 | p.Ala285Val            | c.854C>T          | 8    | HL-VI(MA) | Performed     | NA   |
| 60  | 60            | 16          | PSEN1 | p.Ala285Val            | c.854C>T          | 8    | HL-VI(MA) | Not performed | NA   |
| 61  | 61            | 16          | PSEN1 | p.Ala285Val            | c.854C>T          | 8    | HL-VI(MA) | Not performed | NA   |
| 62  | 62            | 17          | PSEN1 | p.Leu173Phe            | c.519G>C          | 6    | TM-III    | Performed     | 3*4  |
| 63  | 63            | 17          | PSEN1 | p.Leu173Phe            | c.519G>C          | 6    | TM-III    | Performed     | 3*4  |
| 64  | 64            | 17          | PSEN1 | p.Leu173Phe            | c.519G>C          | 6    | TM-III    | Not performed | NA   |
| 65  | 65            | 17          | PSEN1 | p.Leu173Phe            | c.519G>C          | 6    | TM-III    | Not performed | NA   |
| 66  | 66            | 17          | PSEN1 | p.Leu173Phe            | c.519G>C          | 6    | TM-III    | Not performed | NA   |
| 67  | 67            | 17          | PSEN1 | p.Leu173Phe            | c.519G>C          | 6    | TM-III    | Not performed | NA   |
| 68  | 68            | 18          | PSEN1 | p.T440del              | c.1318 1320delACC | 12   | TM-IX     | Performed     | 3*3  |
| 69  | 69            | 18          | PSEN1 | p.T440del              | c.1318 1320delACC | 12   | TM-IX     | Not performed | NA   |
| 70  | 70            | 18          | PSEN1 | p.T440del              | c.1318 1320delACC | 12   | TM-IX     | Not performed | NA   |
| 71  | 71            | 32          | PSEN1 | p.Gly266Ser            | c.796G>A          | 8    | HL-VIa    | Not performed | NA   |
| 72  | 72            | 32          | PSEN1 | p.Gly266Ser            | c.796G>A          | 8    | HL-VIa    | Not performed | NA   |
| 73  | 73            | 32          | PSEN1 | p.Gly266Ser            | c.796G>A          | 8    | HL-VIa    | Not performed | NA   |
| 74  | 74            | 32          | PSEN1 | p.Gly266Ser            | c.796G>A          | 8    | HL-VIa    | Not performed | NA   |
| 75  | 75            | 32          | PSEN1 | p.Gly266Ser            | c.796G>A          | 8    | HL-VIa    | Not performed | NA   |
| 76  | 76            | 32          | PSEN1 | p.Gly266Ser            | c.796G>A          | 8    | HL-VIa    | Performed     | 3*3  |
| 77  | 77            | 33          | PSEN1 | p.Ala431Val            | c.1292C>T         | 12   | HL-VIII   | Performed     | 3*3  |
| 78  | 78            | 34          | PSEN1 | p.Leu420Arg            | c.1259T>C         | 12   | TM-VIII   | Not performed | NA   |
| 79  | 79            | 34          | PSEN1 | p.Leu420Arg            | c.1259T>C         | 12   | TM-VIII   | Not performed | NA   |
| 80  | 80            | 34          | PSEN1 | p.Leu420Arg            | c.1259T>C         | 12   | TM-VIII   | Not performed | NA   |
| 81  | 81            | 34          | PSEN1 | p.Leu420Arg            | c.1259T>C         | 12   | TM-VIII   | Not performed | NA   |
| 82  | 82            | 34          | PSEN1 | p.Leu420Arg            | c.1259T>C         | 12   | TM-VIII   | Not performed | NA   |
| 83  | 83            | 34          | PSEN1 | p.Leu420Arg            | c.1259T>C         | 12   | TM-VIII   | Not performed | NA   |
| 84  | 84            | 34          | PSEN1 | p.Leu420Arg            | c.1259T>C         | 12   | TM-VIII   | Performed     | NA   |
| 85  | 85            | 35          | PSEN1 | p.Glu184Asp            | c.552A>C          | 7    | HL-III    | Not performed | NA   |
| 86  | 86            | 35          | PSEN1 | p.Glu184Asp            | c.552A>C          | 7    | HL-III    | Not performed | 3*3  |
| 87  | 87            | 35          | PSEN1 | p.Glu184Asp            | c.552A>C          | 7    | HL-III    | Not performed | NA   |
| 88  | 88            | 35          | PSEN1 | p.Glu184Asp            | c.552A>C          | 7    | HL-III    | Performed     | 3*3  |
| 89  | 89            | 36          | PSEN1 | p.Gly217Asp            | c.650G>A          | 7    | HL-IV     | Not performed | NA   |
| 90  | 90            | 36          | PSEN1 | p.Gly217Asp            | c.650G>A          | 7    | HL-IV     | Performed     | NA   |
| 91  | 91            | 36          | PSEN1 | p.Gly217Asp            | c.650G>A          | 7    | HL-IV     | Not performed | NA   |
| 92  | 92            | 36          | PSEN1 | p.Gly217Asp            | c.650G>A          | 7    | HL-IV     | Not performed | NA   |
| 93  | 93            | 36          | PSEN1 | p.Gly217Asp            | c.650G>A          | 7    | HL-IV     | Not performed | NA   |
| 94  | 94            | 37          | PSEN1 | p.Glu280Ala            | c.839A>C          | 8    | HL-VI(MA) | Performed     | 3*3  |
| 95  | 95            | 37          | PSEN1 | p.Glu280Ala            | c.839A>C          | 8    | HL-VI(MA) | Not performed | 3*3  |
| 96  | 96            | Sporadic    | PSEN1 | p.Asn405Ser            | c.1214A>G         | 11   | HL-VII    | Performed     | 3*4  |
| 97  | 97            | 38          | PSEN1 | p.Glu123Lys            | c.367G>A          | 5    | HL-I      | Performed     | 2*3  |
| 98  | 98            | 38          | PSEN1 | p.Glu123Lys            | c.367G>A          | 5    | HL-I      | Performed     | 3*3  |
| 99  | 99            | 38          | PSEN1 | p.Glu123Lys            | c.367G>A          | 5    | HL-I      | Not performed | NA   |
| 100 | 100           | 38          | PSEN1 | p.Glu123Lys            | c.367G>A          | 5    | HL-I      | Not performed | NA   |
| 101 | 101           | 39          | PSEN1 | p.His163Arg            | c.488A>G          | 6    | HL-II     | Performed     | 3*3  |
| 102 | 102           | 39          | PSEN1 | p.His163Arg            | c.488A>G          | 6    | HL-II     | Performed     | 3*3  |
| 103 | 103           | 39          | PSEN1 | p.His163Arg            | c.488A>G          | 6    | HL-II     | Performed     | NA   |
| 104 | 104           | 40          | PSEN1 | p.Arg269His            | G>A               | 8    | HL-VIa    | Performed     | 3*4  |
| 105 | 105           | 41          | PSEN1 | p.Glu273Ala            | A>C               | 8    | HL-VIa    | Performed     | 3*3  |
| 106 | 106           | 42          | PSEN1 | p.Gly384Ala            | c.1151G>C         | 11   | TM-VII    | Performed     | 3*3  |
| 107 | 107           | Sporadic    | PSEN1 | p.His163Arg            | c.488A>G          | 6    | HL-II     | Performed     | 3*3  |

# Supplementary Figure 1

## (A) Gene search

### Gene Search (Mutations)

[http://alzdb.bri.niigata-u.ac.jp/jfad/gene\\_search\\_mutations.html](http://alzdb.bri.niigata-u.ac.jp/jfad/gene_search_mutations.html) / JFAD

Select a gene symbol:

APP  
PSEN1  
PSEN2  
MAPT  
GRN

## (B) Phenotype search

### Phenotype Search

[http://alzdb.bri.niigata-u.ac.jp/jfad/phenotype\\_search.html](http://alzdb.bri.niigata-u.ac.jp/jfad/phenotype_search.html) / JFAD

Select a phenotype:

AD  
AD with SP  
bvFTD  
Dementia  
Depression followed by EOAD  
DLB with SP  
EOAD  
EOAD with SP  
FTD  
FTLD  
MCI  
Perry syndrome  
Pick's disease  
PNFA  
PNLD  
PPA  
PSP  
SD

     Abbreviations are [here](#)

## (C) List of mutation

| Gene | # of Pedigrees | Mutation(Protein) | Mutation(DNA)     | PMID                                                                                                                                                               | ICSID (Mainly Japanese) |
|------|----------------|-------------------|-------------------|--------------------------------------------------------------------------------------------------------------------------------------------------------------------|-------------------------|
| APP  | 2              | duplication       |                   | Kasuga K et al. (2009)                                                                                                                                             |                         |
| APP  | 1              | p.Lys510Asn       | c.1530G>C         |                                                                                                                                                                    | 2010127819              |
| APP  | 1              | p.Lys510Asn       | c.1530G>T or C    |                                                                                                                                                                    | 15320137                |
| APP  | 1              | p.Asp678Asn       | c.2032G>A         | Wakutani Y et al. (2004)                                                                                                                                           |                         |
| APP  | 3              | p.Glu693del       | c.del2077-2079GAA | Tomiyama T et al. (2008)                                                                                                                                           |                         |
| APP  | 7              | p.Val717Ile       | c.2149G>A         | Matsumura Y et al. (1996)<br>Yoshioka K et al. (1991)<br>Naruse S et al. (1991)<br>Yoshizawa T et al. (1993)<br>Katsuya T et al. (1993)<br>Imagawa M et al. (1992) | 1993010101              |

## (D) Detailed information on clinical features

| ApoE | Familial or Sporadic | Age at Onset | Onset of Dementia | Initial Symptom | Psychiatric Symptom | Mood Disorder | Spastic Paraparesis | Parkinsonism or Rigidity | Epilepsy or Seizure | Age of Death |
|------|----------------------|--------------|-------------------|-----------------|---------------------|---------------|---------------------|--------------------------|---------------------|--------------|
| 3*3  | Familial             | 29           | 29                | Ci              |                     |               | +                   |                          |                     |              |
|      | Familial             |              |                   |                 |                     |               |                     |                          |                     | early 40s    |
|      | Familial             | 40           | 42                | Sp              |                     |               | +                   | +                        |                     |              |

**Figure legend:** Snapshot of “JFADdb”. Representative images of displays in databases such as “Gene Search” (A), “Phenotype Search” (B), “List of mutation” (C), and “Detailed information on clinical features” (D) for each patient are shown.

## Supplementary Figure 2

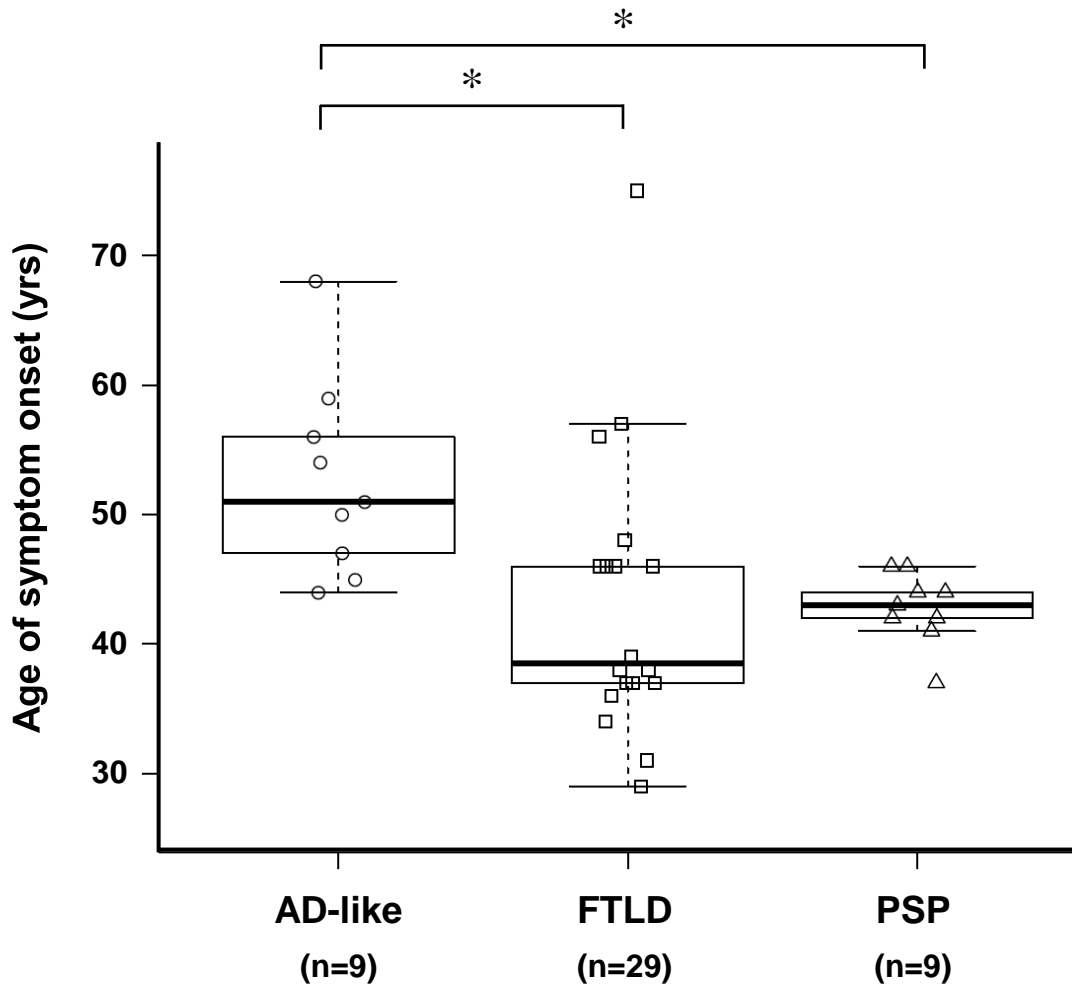

**Figure legend:** Ages at onset in three clinical phenotypes with *MAPT* mutations: FTLD, AD-like, and PSP phenotypes. The age at onset of patients with the FTLD ( $44 \pm 10$  years) or PSP phenotype ( $43 \pm 3$  years) was significantly younger than that with the AD-like phenotype ( $53 \pm 8$  years) (\* $p < 0.05$ , ANOVA with post-hoc Tukey's test). Results are shown as box-whistler plot.

### Supplementary Figure 3

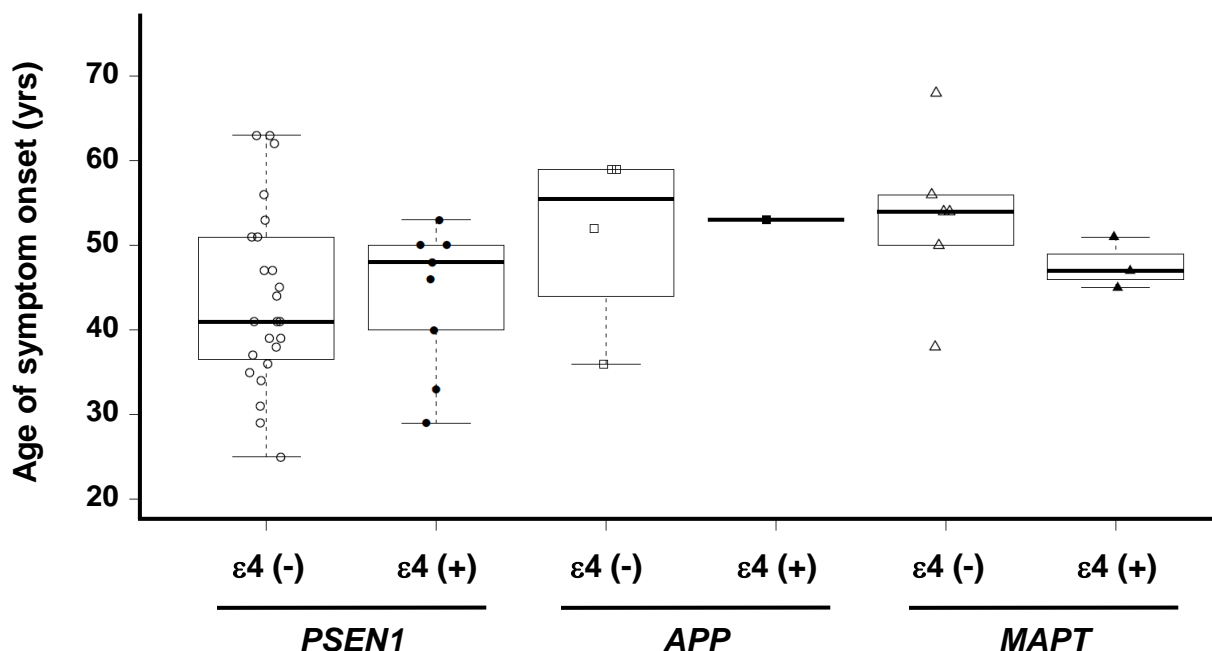

**Figure legend:** Effect of *APOE*  $\epsilon 4$  on age at onset of Japanese FAD and FTDP-17. Forty-seven patients had additional information on their *APOE* genotypes. Each group of patients with gene mutations were stratified into *APOE*  $\epsilon 4$  carriers and noncarriers. There was no significant difference in the age at onset between *APOE*  $\epsilon 4$  carriers and noncarriers in familial dementia ( $p=0.86$ , Mann-Whitney *U*-test).

## Supplementary Figure 4

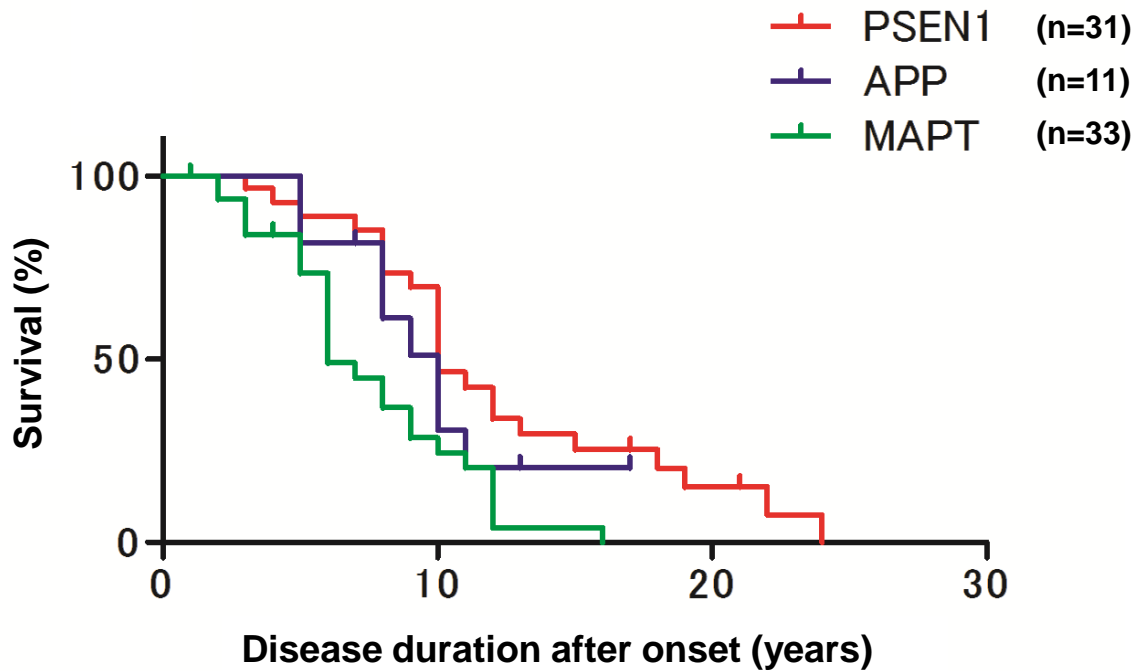

**Figure legend:** Survival of patients with *PSEN1* (n=31), *APP* (n=11), and *MAPT* mutations (n=33) examined by Kaplan-Meier analysis. The log-rank test revealed that patients with *MAPT* mutations showed a shorter survival than those with *PSEN1* or *APP* mutations ( $p < 0.05$ ).
